# Supplementary material for: A dynamic interaction between CD19 and the tetraspanin CD81 controls B cell co-receptor trafficking
Source: eLife journal article supplement (doi:10.7554/elife.52337), 2020-04-27

**A****CD81 Surface Staining**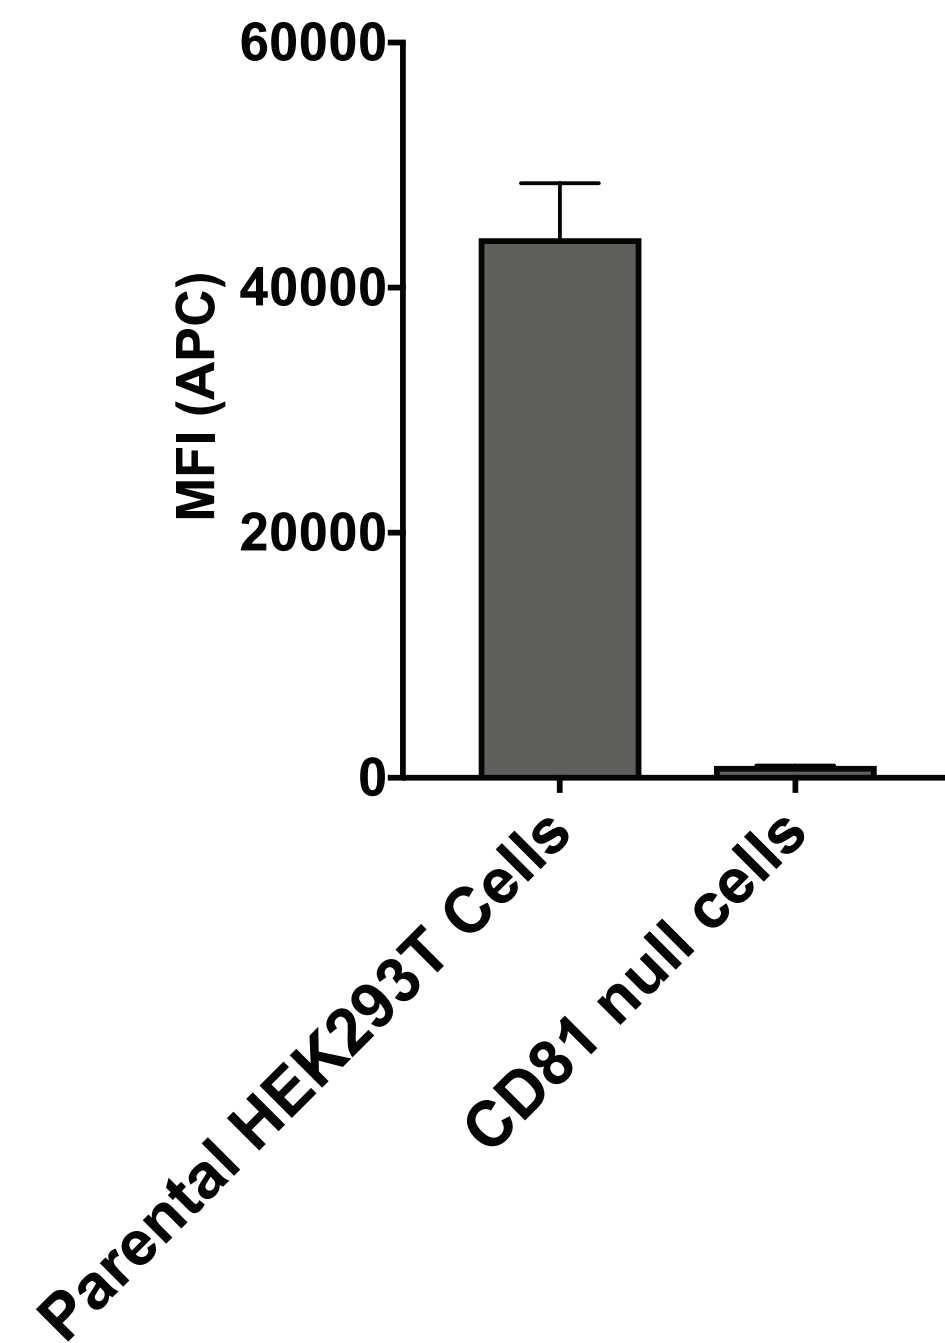**B**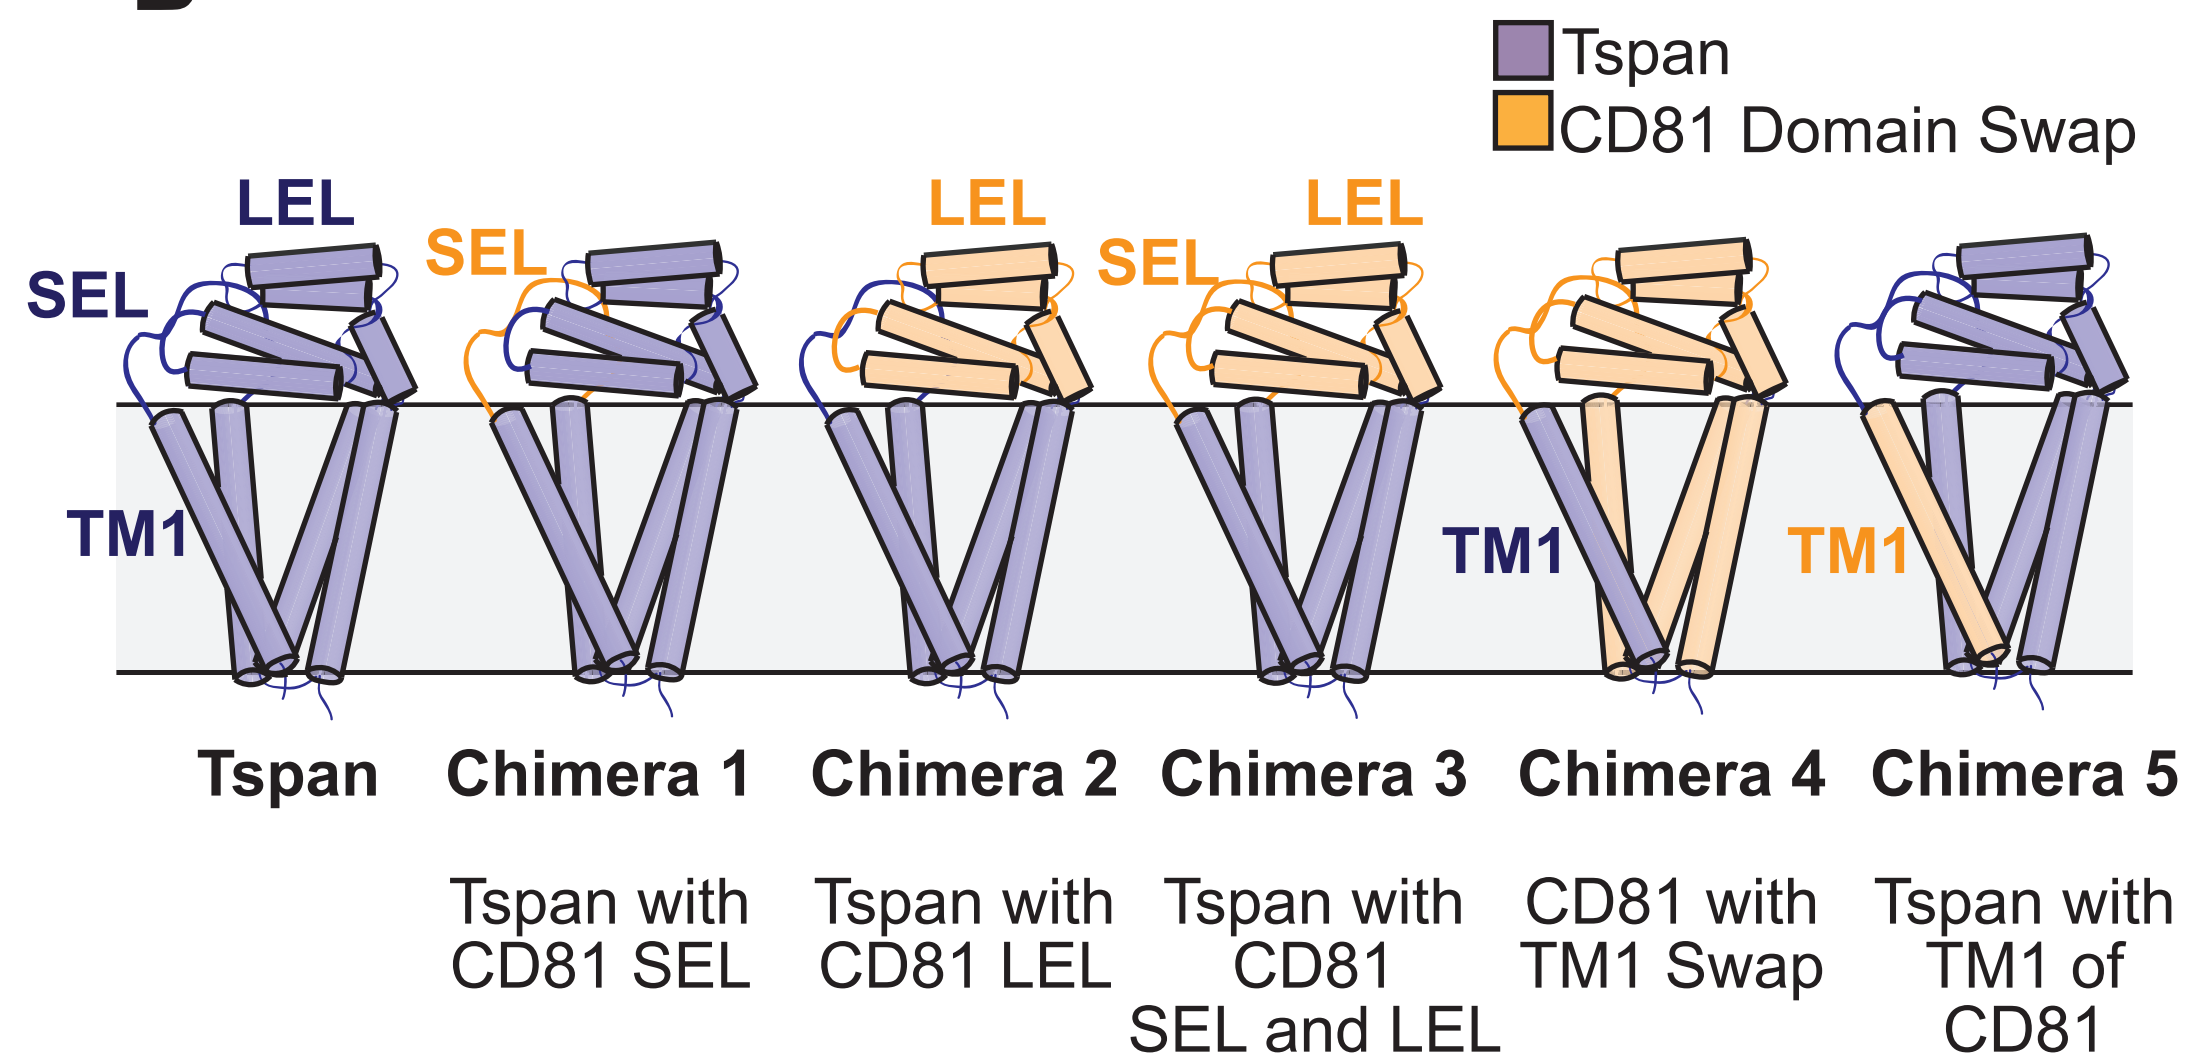**C****Surface Staining of CD9/CD81 Chimeras**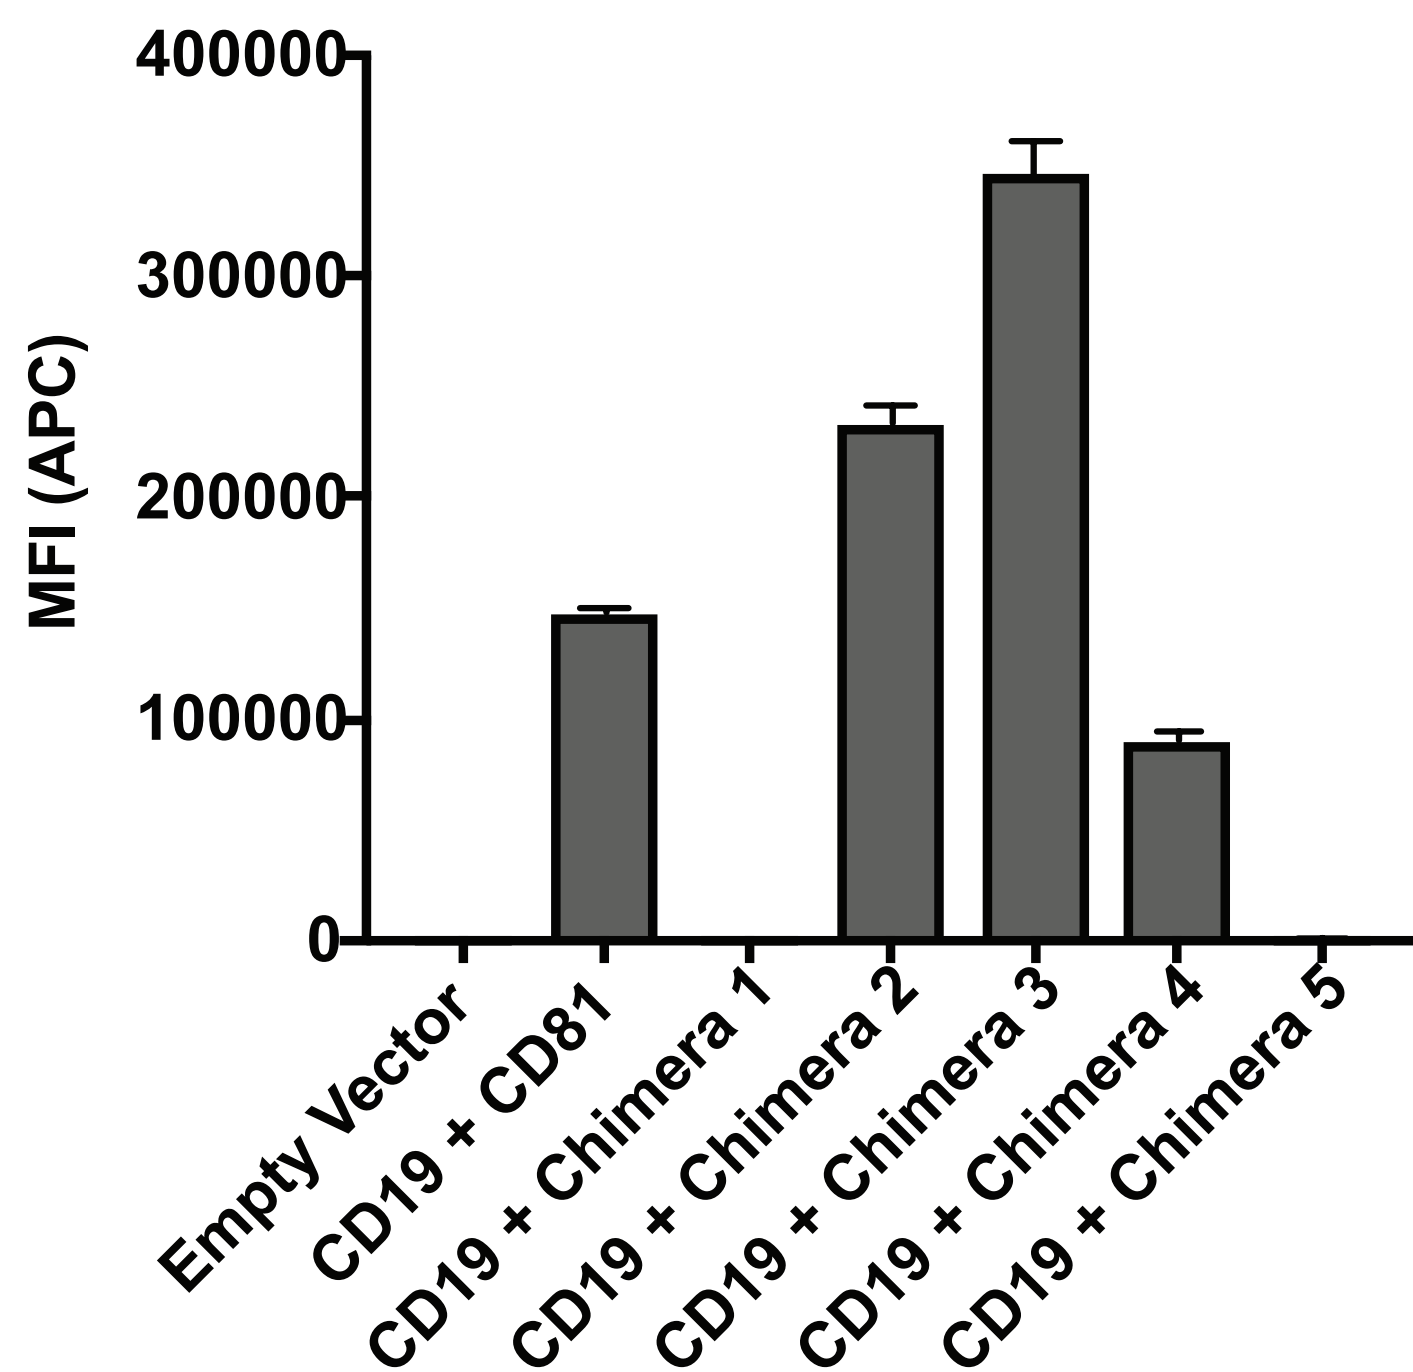**D****Surface Staining of CD81/Tspan15 Chimeras**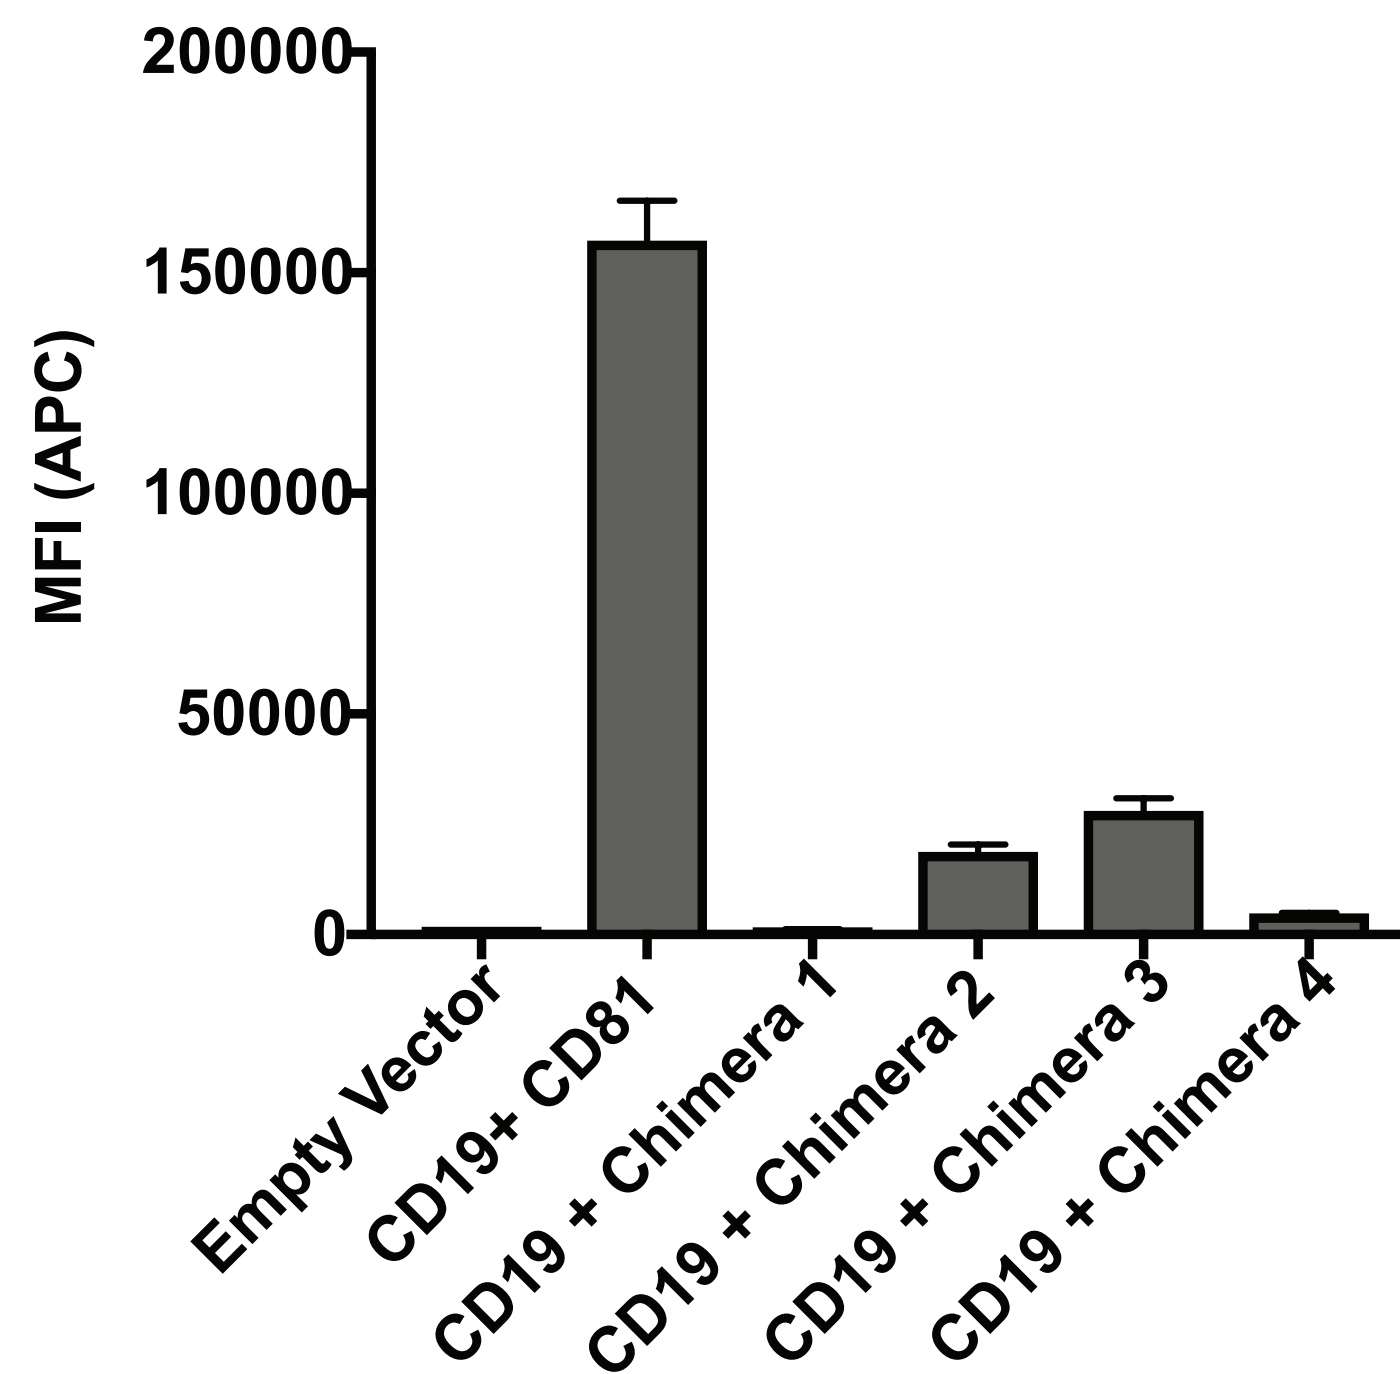

Supplement: supp [file elife_poa_e52337_Figure_1_figure_supplement_1.pdf › elife_poa_e52337_Figure_1_figure_supplement_1.pdf]
