# Supplementary material for: A dynamic interaction between CD19 and the tetraspanin CD81 controls B cell co-receptor trafficking
Source: eLife journal article supplement (doi:10.7554/elife.52337), 2020-04-27

# Gating Strategy for Primary B Cells

Viable Cells  $\longrightarrow$  Singlets  $\longrightarrow$  CD20+ Cells

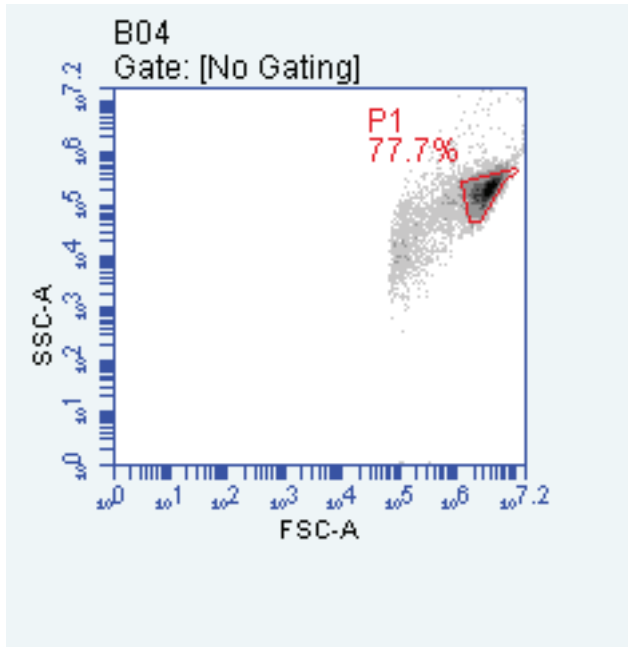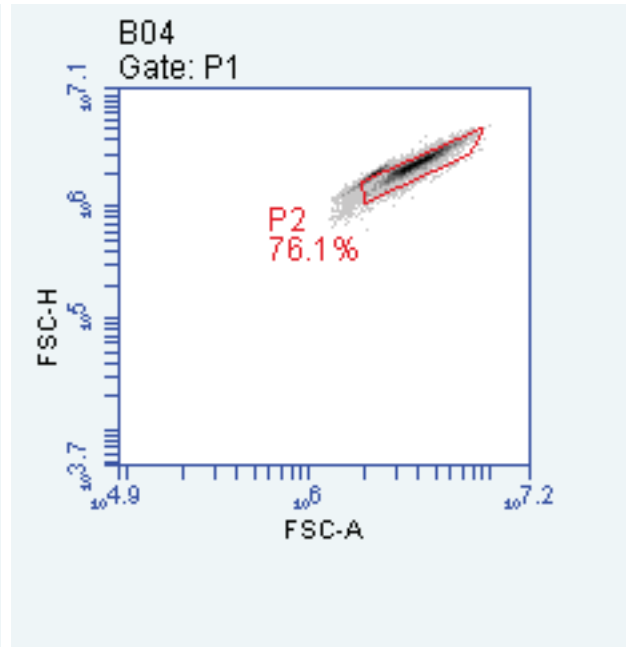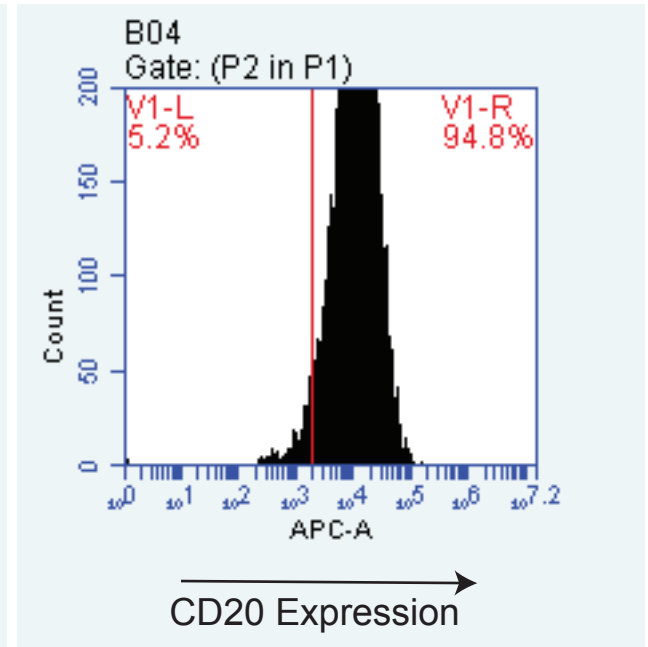

Supplement: supp [file elife_poa_e52337_Figure_4_figure_supplement_2.pdf › elife_poa_e52337_Figure_4_figure_supplement_2.pdf]
