# Supplementary figures and images for: A dynamic interaction between CD19 and the tetraspanin CD81 controls B cell co-receptor trafficking
Source: eLife journal article supplement (doi:10.7554/elife.52337), 2020-04-27

# Gating Strategy for HEK293T Cells

Viable Cells

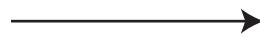

Singlets

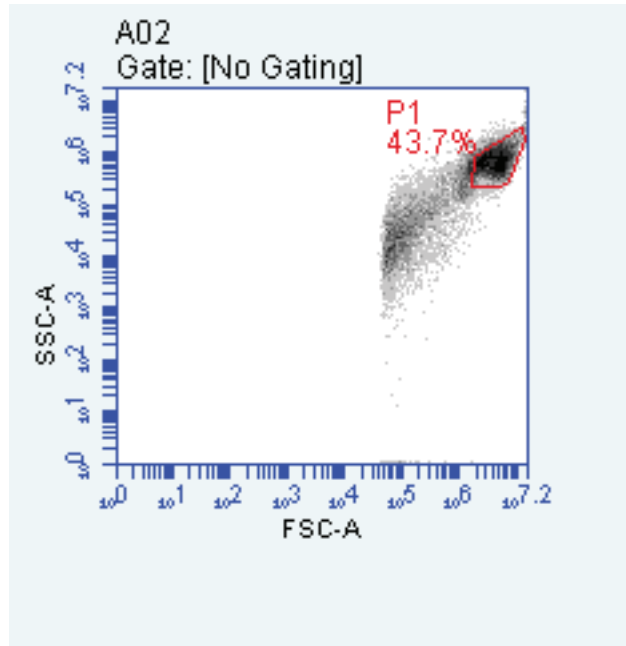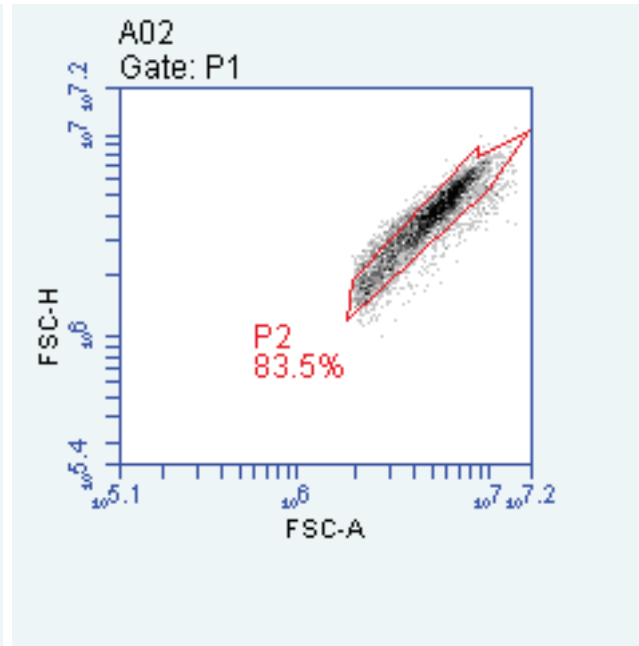

Supplement: supp [file elife_poa_e52337_Figure_1_figure_supplement_2.pdf › elife_poa_e52337_Figure_1_figure_supplement_2.pdf]

## CD19 Surface Staining

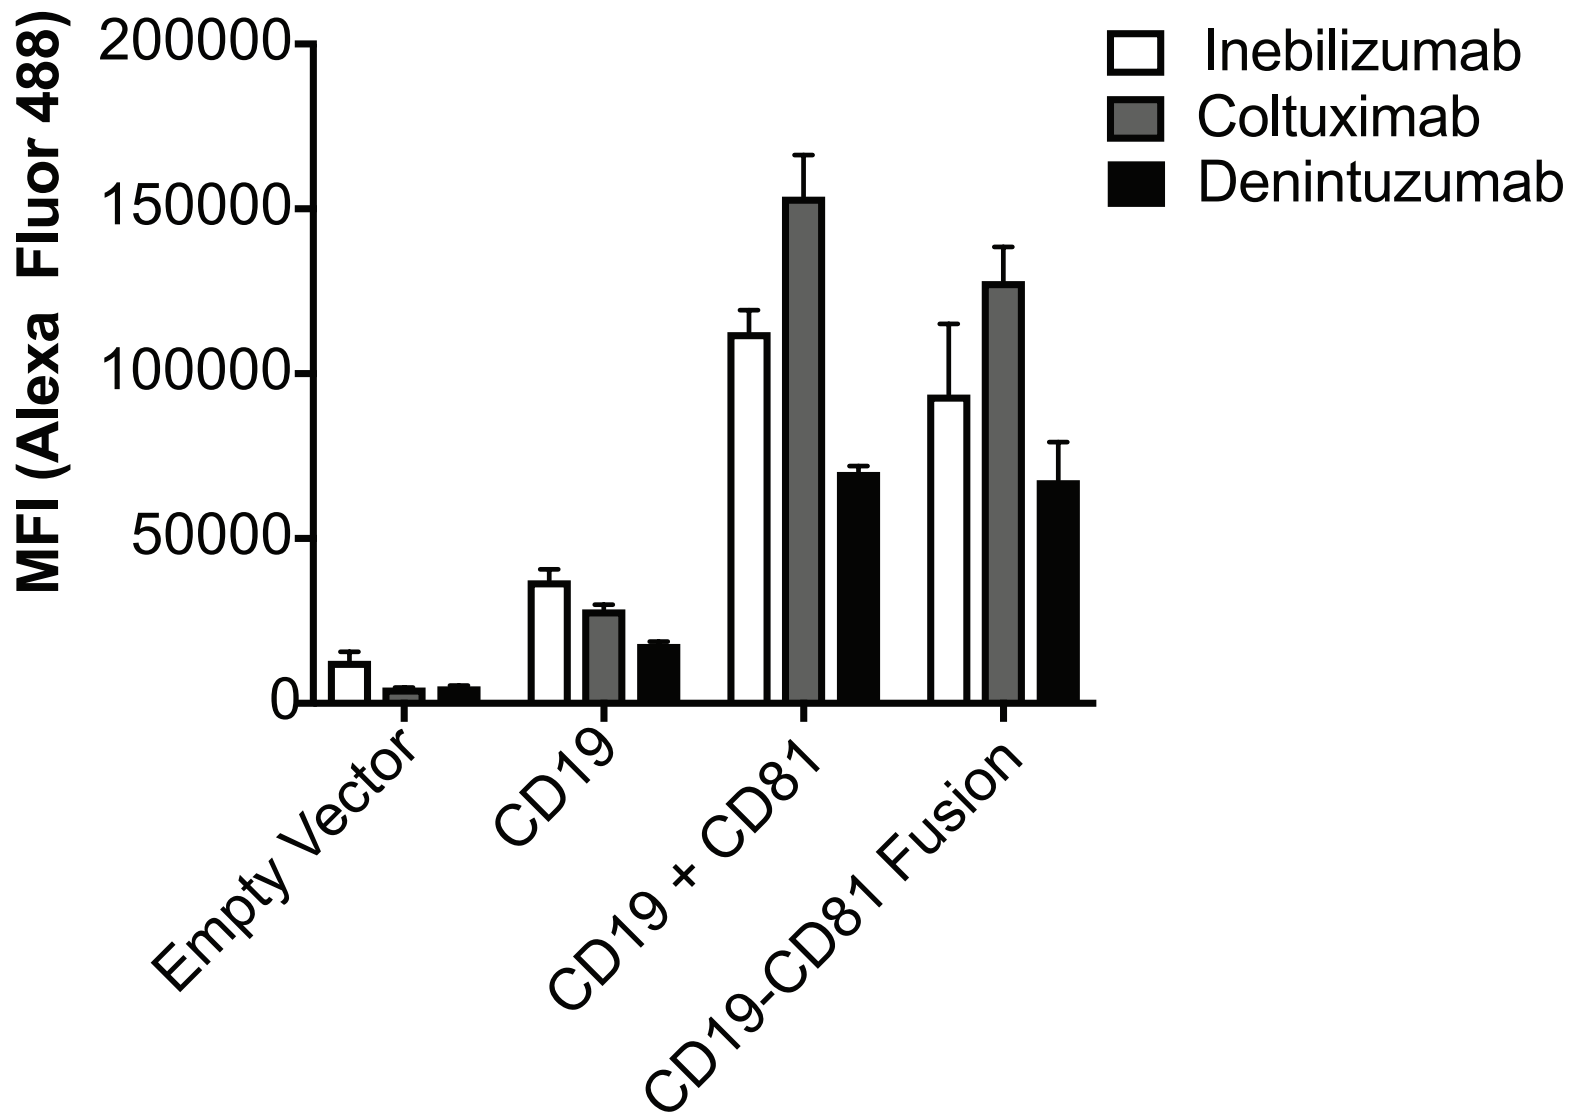

Supplement: supp [file elife_poa_e52337_Figure_2_figure_supplement_1.pdf › elife_poa_e52337_Figure_2_figure_supplement_1.pdf]

A

5A6 Light Chain

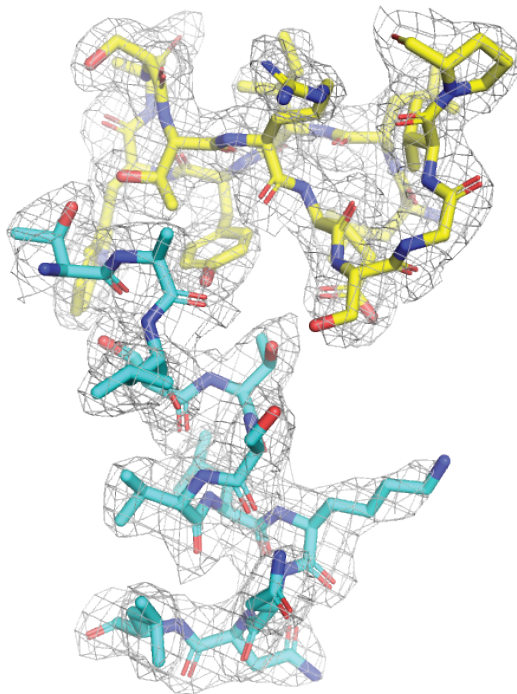

CD81 Helix C

B

5A6 Heavy Chain

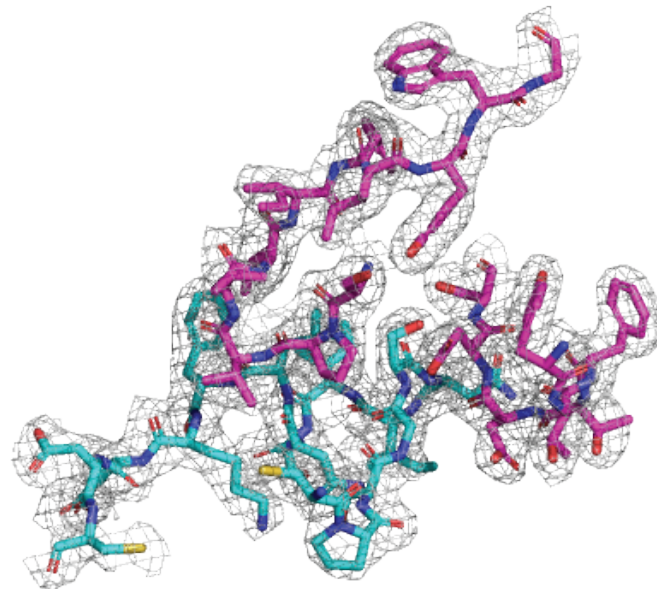

CD81 Helix D

Supplement: supp [file elife_poa_e52337_Figure_3_figure_supplement_1.pdf › elife_poa_e52337_Figure_3_figure_supplement_1.pdf]

**A**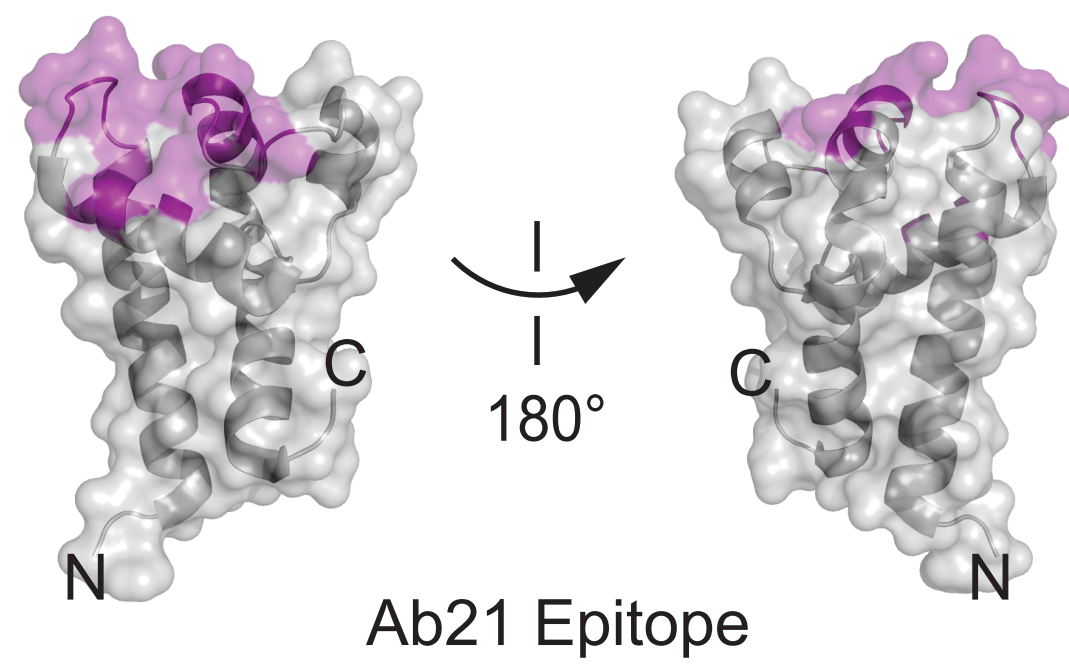**B**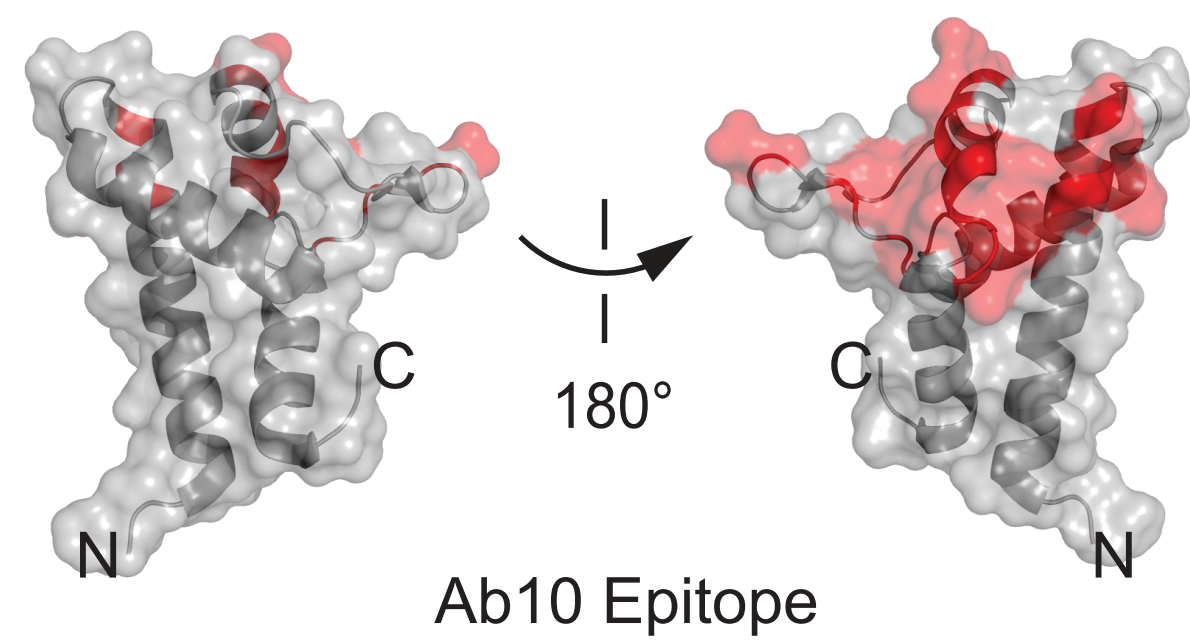**C**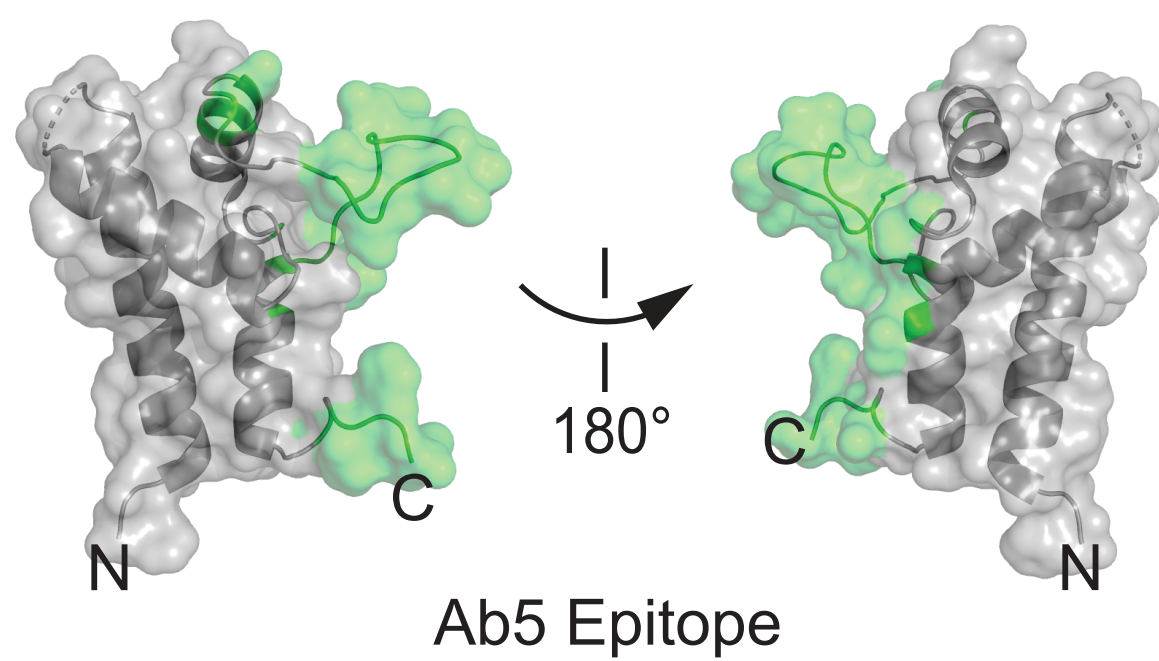**D**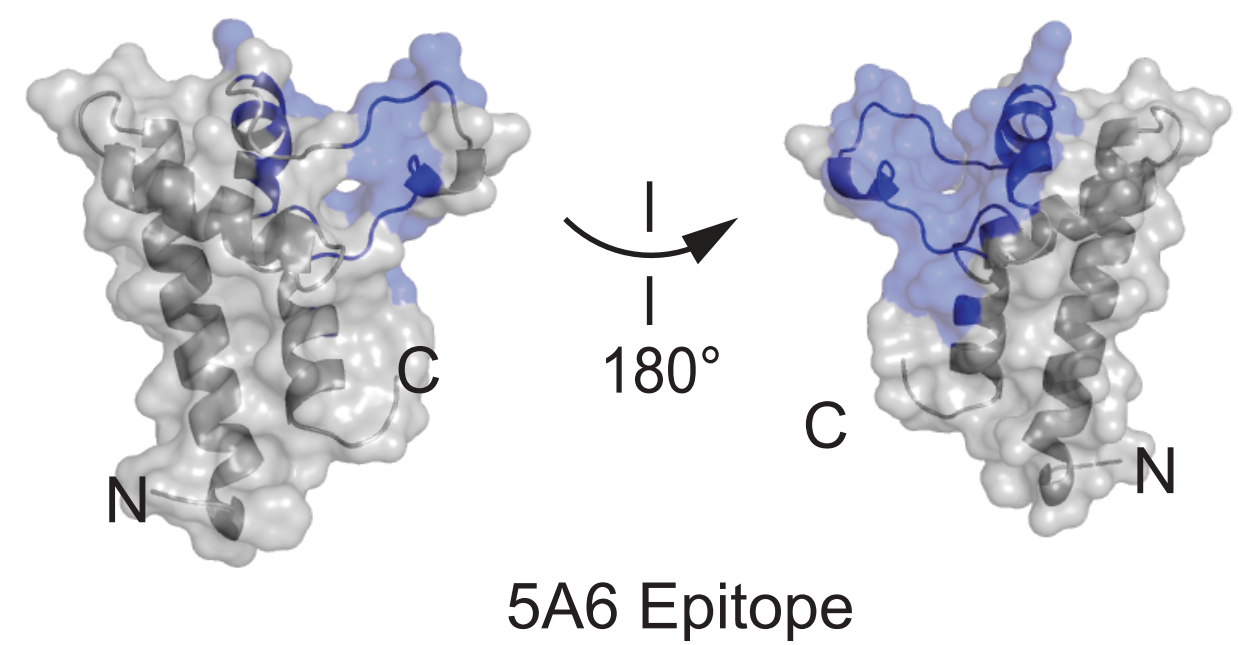**E**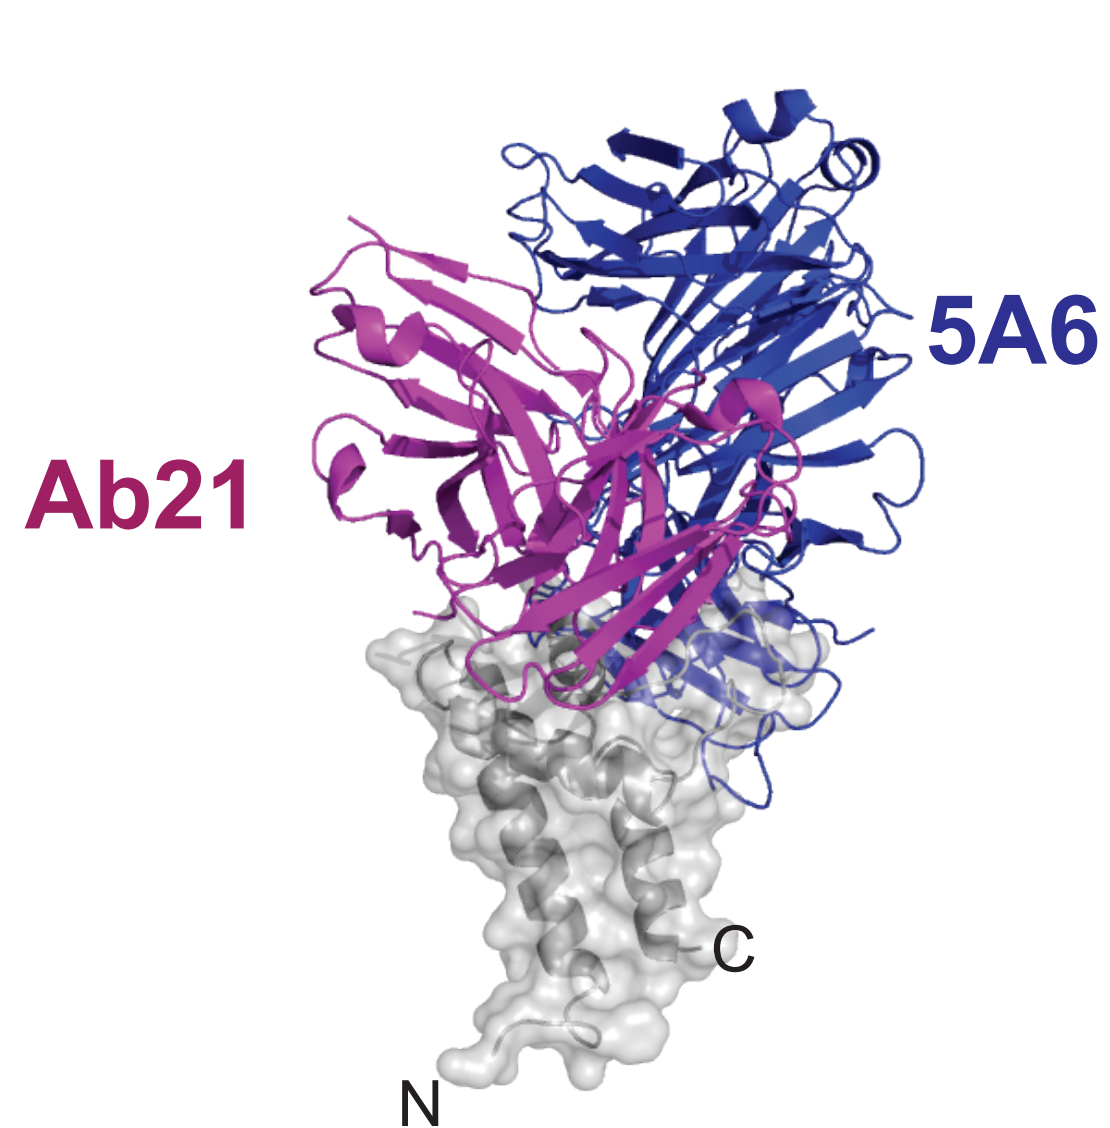**F**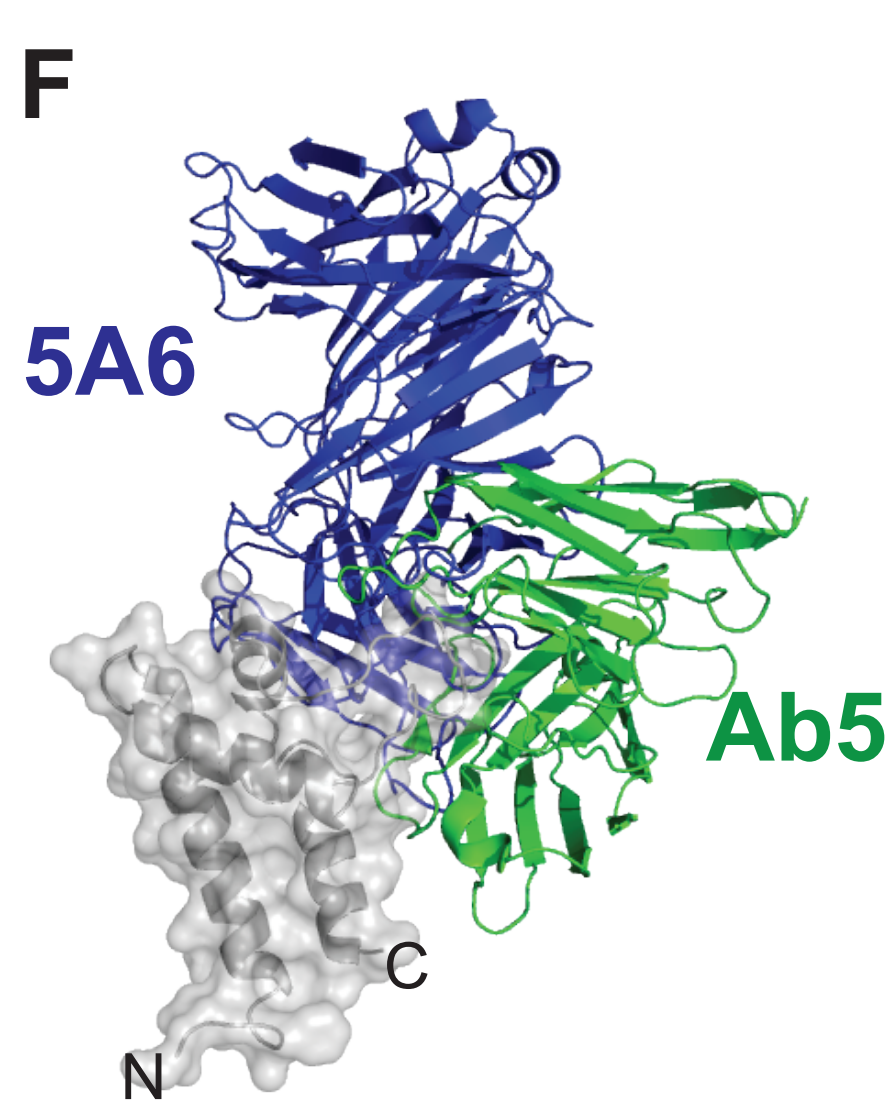**G**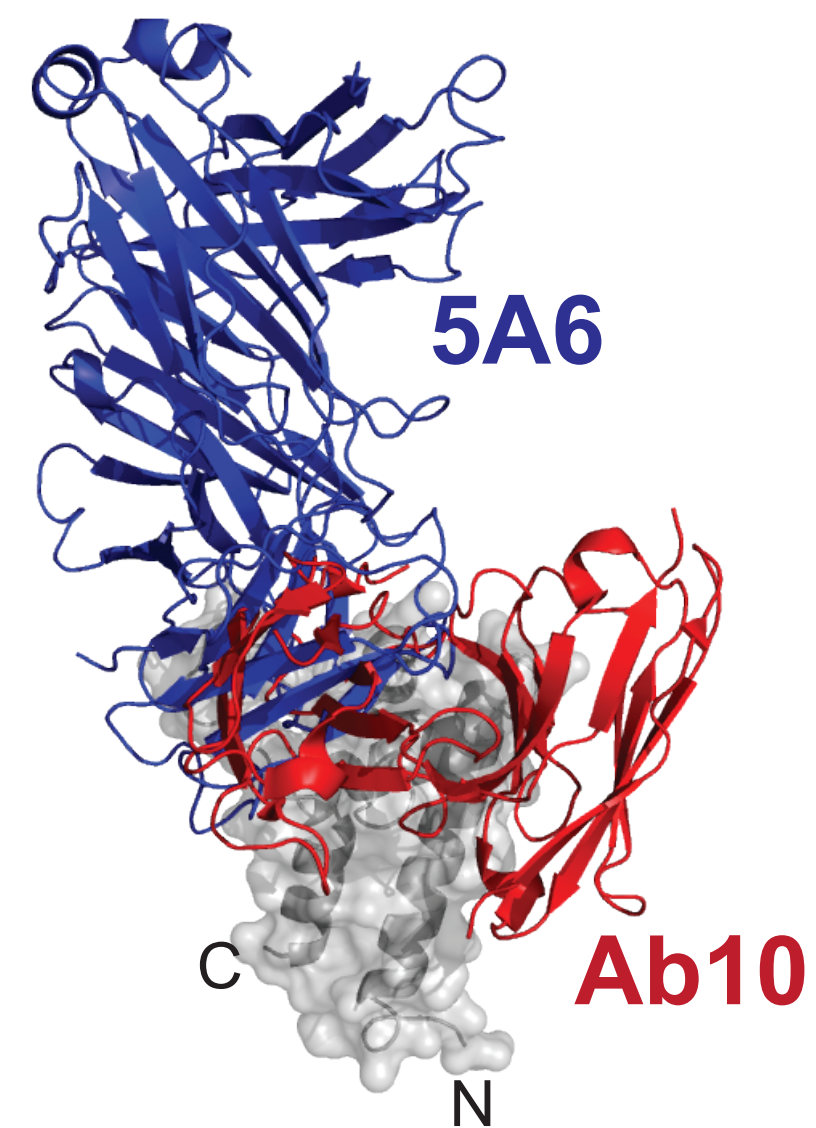

Supplement: supp [file elife_poa_e52337_Figure_3_figure_supplement_2.pdf › elife_poa_e52337_Figure_3_figure_supplement_2.pdf]

# Surface Staining of Polyalanine Helix C and D Mutants

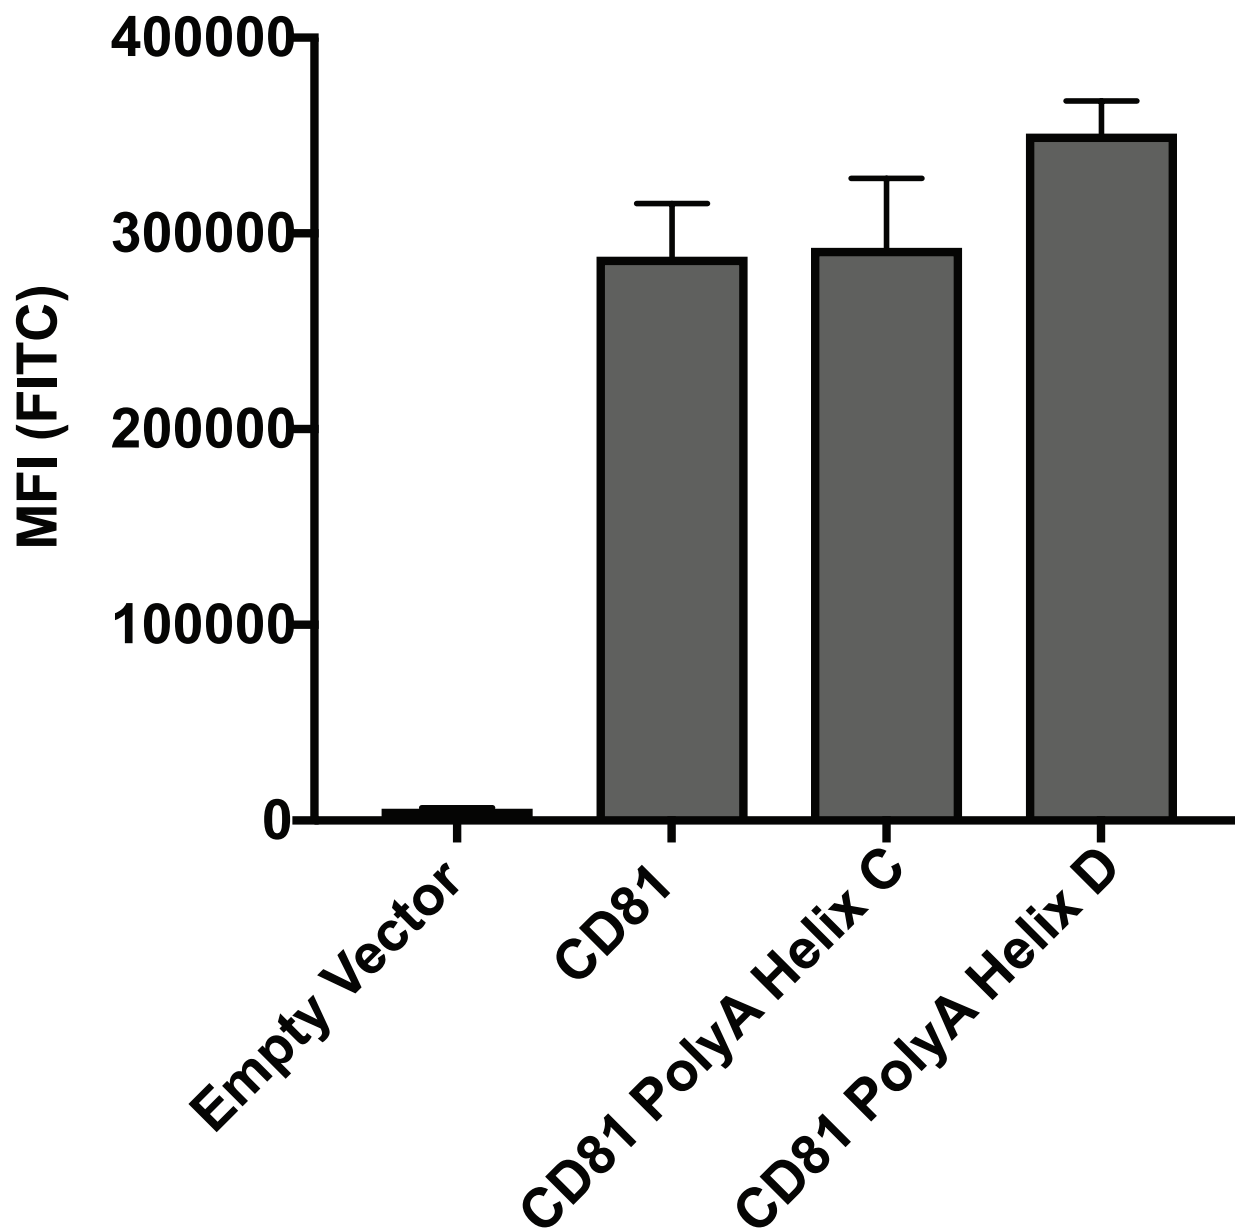

Supplement: supp [file elife_poa_e52337_Figure_3_figure_supplement_3.pdf › elife_poa_e52337_Figure_3_figure_supplement_3.pdf]

**A**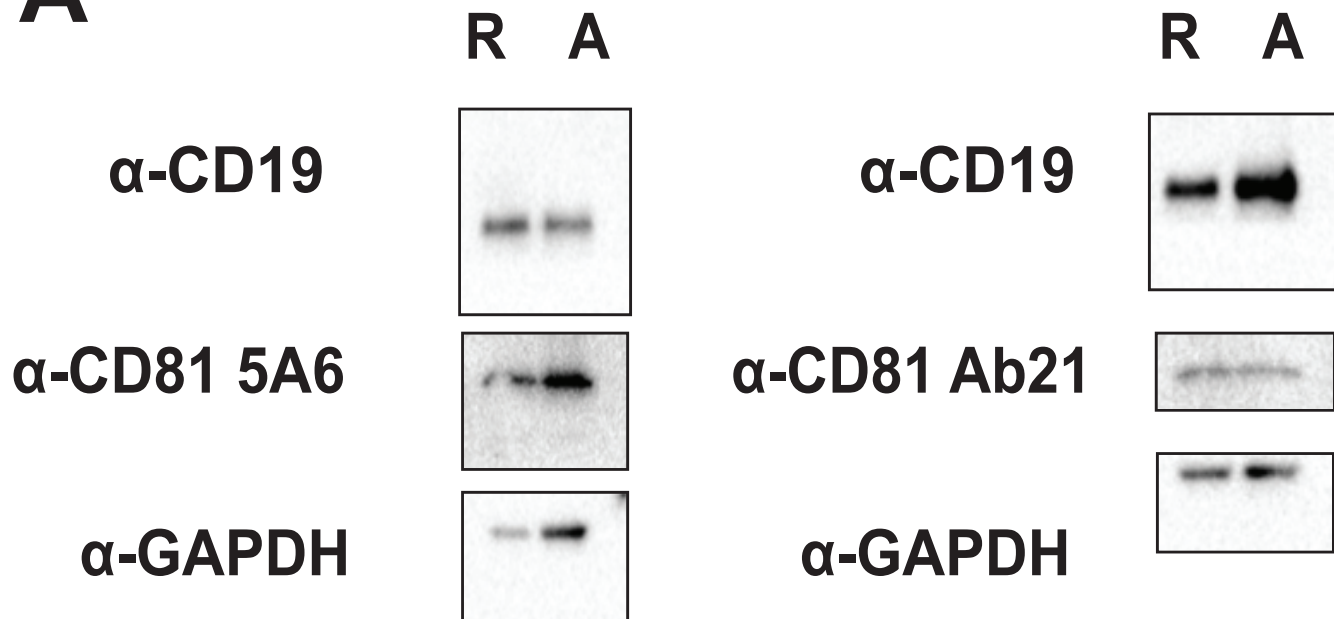**B**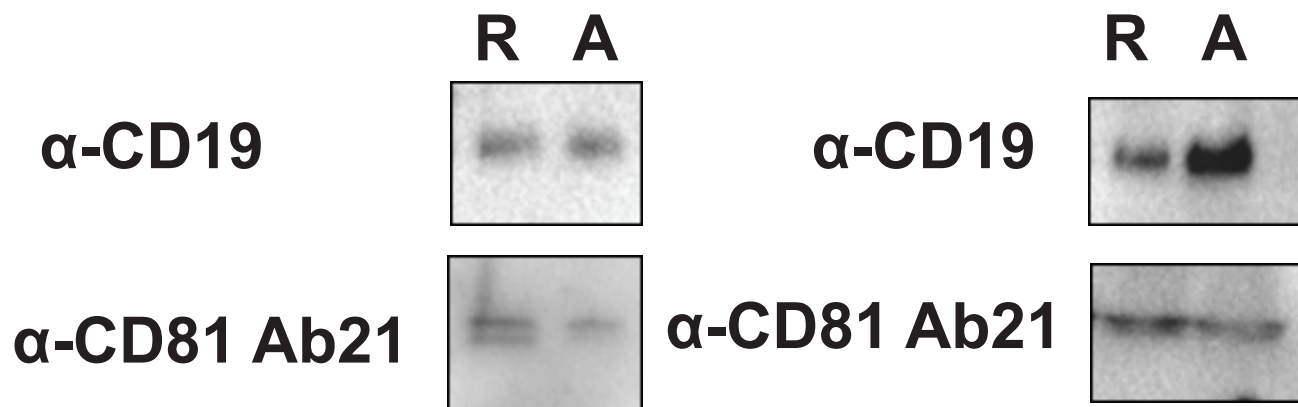

Supplement: supp [file elife_poa_e52337_Figure_4_figure_supplement_1.pdf › elife_poa_e52337_Figure_4_figure_supplement_1.pdf]
